# Supplementary material
Source: publisher figshare collection journal article supplement (https://karger.figshare.com/ndownloader/files/13687163)
Supplement: Supplementary file 1 [file 13687163]

## SUPPLEMENTARY MATERIAL

# **The Role of Intestinal Fatty Acid Binding Proteins in Protecting Cells from Fatty Acid Induced Impairment of Mitochondrial Dynamics and Apoptosis**

Suparna Sarkar-Banerjee<sup>a</sup> Sourav Chowdhury<sup>b</sup> Dwipanjana Sanyal<sup>b</sup> Tulika Mitra<sup>c</sup>  
Sib S Roy<sup>c</sup> Krishnananda Chattopadhyay<sup>b</sup>

<sup>a</sup>Department of Integrative Biology and Pharmacology, The University of Texas Medical School, Houston, USA,

<sup>b</sup>Protein Folding and Dynamics Laboratory, Structural Biology and Bioinformatics Division, CSIR-Indian Institute of Chemical Biology, Kolkata, <sup>c</sup>Cell Biology and Physiology Division, CSIR-Indian Institute of Chemical Biology, Kolkata, India

**Table S1: Primers used for sub-cloning**

| Constructs | Forward primer (5' à 3') | Forward primer (5' à 3')   |
|------------|--------------------------|----------------------------|
| pEGFP-N1   | GCTCGAGATGGCATTGATGGC    | CGGGATCCCGTTCCTTCTTAAAGATC |

**Table S2: D of IFABP-GFP inside HeLa cells as measured by FCS**

| Locations                            | D, $\mu\text{m}^2 \text{sec}^{-1}$ |
|--------------------------------------|------------------------------------|
| Cytoplasm                            | $8.3 \pm 0.1$                      |
| Peri-nuclear region (fast component) | $3.3 \pm 0.3$                      |
| Peri-nuclear region (slow component) | $0.8 \pm 1.1$                      |

**Fluorescence correlation spectroscopy data analysis:**

The autocorrelations  $G(\tau)$  obtained from IFABP's free cytosolic species in the FCS experiment, were fitted using single component diffusion model (without any triplet contribution), as shown below:

$$G(\tau) = 1 + \frac{1}{N} \cdot \frac{1}{(1 + \frac{\tau}{\tau_D})} \cdot \frac{1}{(1 + S^2 \frac{\tau}{\tau_D})^{1/2}} \quad (1)$$

where,  $\tau_D$  is the translational diffusion time of the fluorescent species,  $N$  is the average number of fluorescent molecules present in the confocal volume,  $S$  is the structural parameter that defines the ratio between the radius and the height of the confocal volume.

Considering the cellular compartments to be crowded, our data were fit to an anomalous diffusion model with the power law  $\langle r(t)^2 \rangle \sim t^{d_w}$  for the mean-square displacement [1, 2],

$$G(\tau) = \frac{1/N}{\left(1 + \left(\frac{\tau}{\tau_D}\right)^{2/d_w}\right) \left(1 + \frac{1}{S^2} \left(\frac{\tau}{\tau_D}\right)^{2/d_w}\right)^{1/2}} \quad (2)$$

where,  $d_w$  is the degree of anomaly.  $d_w$  with a value of 2 is considered as the free Brownian diffusion, while with a value greater than 2 shows obstructed diffusion and value less than 2 implies facilitated diffusion.

The bright dynamic clustered species around the nucleus were analyzed using two diffusional fitting model (without any triplet contributions) that could be defined as:

$$G(\tau) = 1 + \frac{1}{N} \sum_i \frac{A_i}{\left(1 + \left(\frac{\tau}{\tau_{D_i}}\right)\right)} \times \frac{1}{\left(1 + S^2 \left(\frac{\tau}{\tau_{D_i}}\right)\right)^{1/2}} \quad (3)$$

Here,  $\tau_{D_i}$  is the translational diffusion time of the  $i^{\text{th}}$  fluorescently labeled diffusing species in the cell and  $A_i$  is the relative amplitude of the diffusing species. It should be noted that,

$$\sum_i A_i = 1 \quad (4)$$

We have typically used a two component diffusion model, since our autocorrelation curves could not fit well into a single component one diffusion model. The fast diffusion component corresponds to the unhindered diffusion of the protein clusters, while the slow component corresponds to the diffusion of the protein clusters inside the heterogeneous crowded cellular environment. The two diffusion model was used earlier to explain protein diffusion inside live cells [3].

The relation between the values of  $\tau_D$  obtained by fitting the correlation function and the diffusion coefficient ( $D$ ) of a molecule is given by the following equation:

$$\tau_D = \frac{\omega^2}{4D} \quad (5)$$

#### SUPPLEMENTARY FIGURE

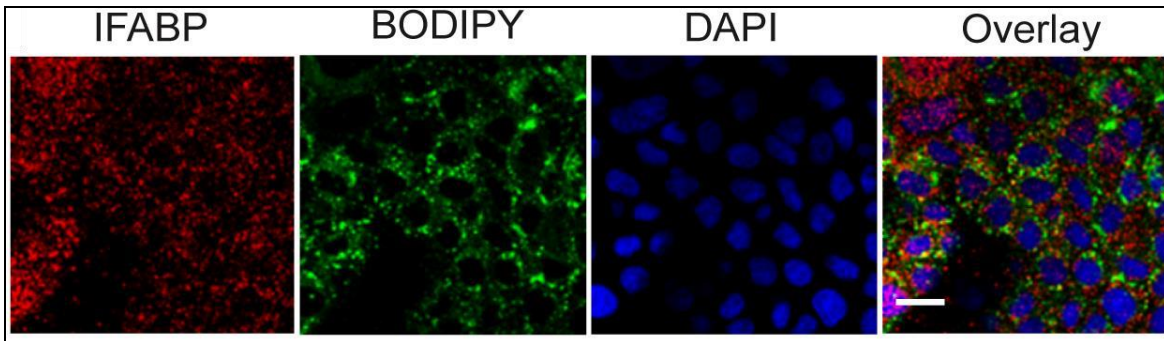

**Supplementary Fig. S1:** Immunocytochemistry of Caco-2 cells showing expression of basal IFABP (red) along with the uptake and distribution of BODIPY FL C16 (green), scale bar 25  $\mu\text{m}$ .

## REFERENCES

- 1 Schwille P, Korch J, Webb WW: Fluorescence correlation spectroscopy with single-molecule sensitivity on cell and model membranes. *Cytometry* 1999;36:176-182.
- 2 Banks DS, Fradin C: Anomalous diffusion of proteins due to molecular crowding. *Biophys J* 2005;89:2960-2971.
- 3 Schmick M, Vartak N, Papke B, Kovacevic M, Truxius DC, Rossmann L, Bastiaens PI: KRas localizes to the plasma membrane by spatial cycles of solubilization, trapping and vesicular transport. *Cell* 2014;157:459-471.
